# Supplementary material for: 6-Week Supplementation with Tribulus terrestris L. to Trained Male CrossFit® Athletes on Muscle, Inflammation, and Antioxidant Biomarkers: A Randomized, Single-Blind, Placebo-Controlled Trial
Source: Int J Environ Res Public Health. 2022 Dec 2;19(23):16158. doi: 10.3390/ijerph192316158 (PMC9736311; doi:10.3390/ijerph192316158)
Supplement: Supplementary file 1 [file ijerph-19-16158-s001.zip › ijerph-1893412-Supplementary Materials.pdf]

### CONSORT 2010 Flow Diagram

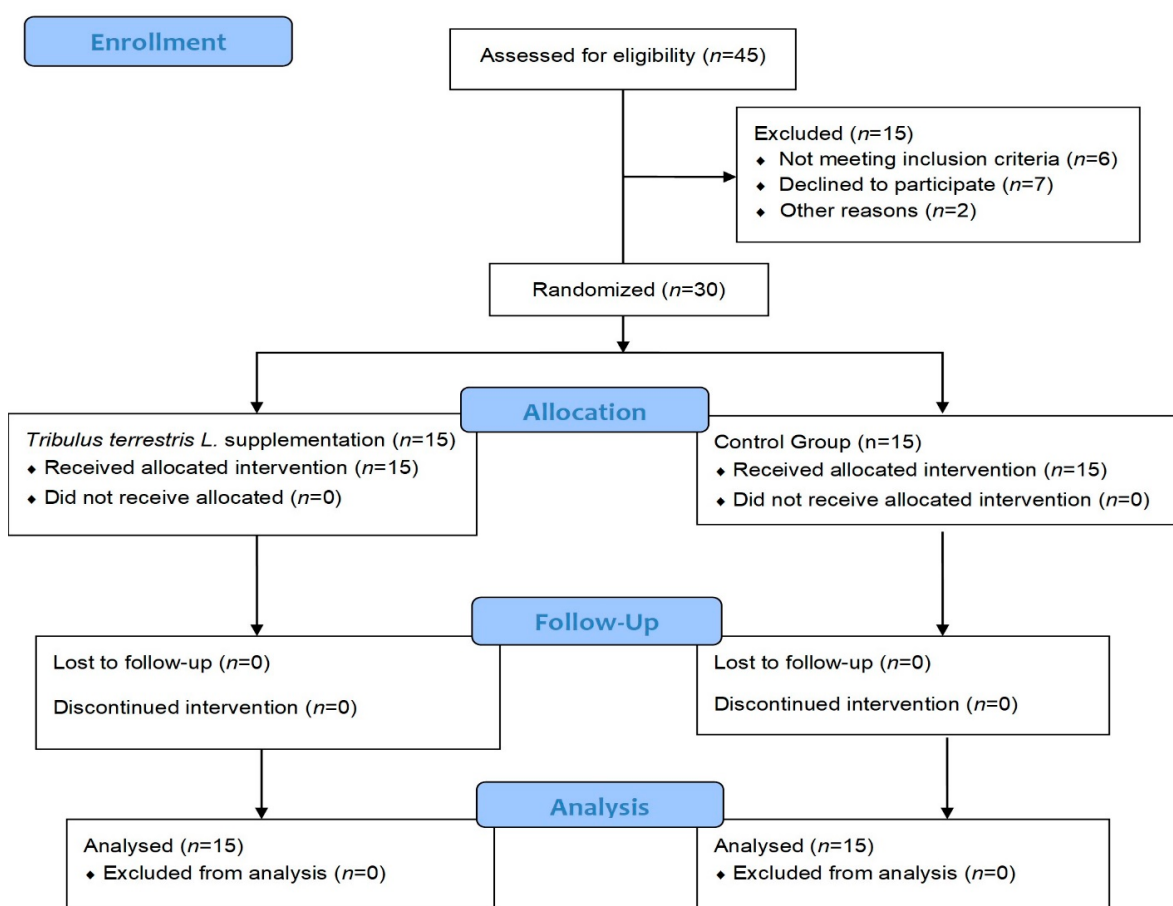

**Figure S1.** A flow chart of the enrolment and randomization process, according to the CONSORT guideless. Reproduced with appropriate permissions from Ref. [18]. Copyright 2010 CONSORT Statement <https://www.consort-statement.org/download/Media/Default/Downloads/CONSORT%202010%20Flow%20Diagram.doc>.

**Table S1.** CONSORT 2010 checklist of information to include when reporting a randomized trial. Reproduced with appropriate permissions from Ref. [18]. Copyright 2010 CONSORT Statement <https://www.consort-statement.org/download/Media/Default/Downloads/CONSORT%202010%20Checklist.doc>.

| Section/Topic                    | Item N° | Checklist Item                                                                                                          | Reported on Page n° |
|----------------------------------|---------|-------------------------------------------------------------------------------------------------------------------------|---------------------|
| <b>Title and abstract</b>        | 1a      | Identification as a randomized trial in the title                                                                       | 1                   |
|                                  | 1b      | Structured summary of trial design, methods, results, and conclusions (for specific guidance see CONSORT for abstracts) | 2                   |
| <b>Introduction</b>              |         |                                                                                                                         |                     |
| <i>Background and objectives</i> | 2a      | Scientific background and explanation of rationale                                                                      | 3                   |
|                                  | 2b      | Specific objectives or hypotheses                                                                                       | 4                   |
| <b>Methods</b>                   |         |                                                                                                                         |                     |

|                                                             |     |                                                                                                                                                                                             |       |
|-------------------------------------------------------------|-----|---------------------------------------------------------------------------------------------------------------------------------------------------------------------------------------------|-------|
| <i>Trial design</i>                                         | 3a  | Description of trial design (such as parallel, factorial) including allocation ratio                                                                                                        | 5     |
|                                                             | 3b  | Important changes to methods after trial commencement (such as eligibility criteria), with reasons                                                                                          | -     |
| <i>Participants</i>                                         | 4a  | Eligibility criteria for participants                                                                                                                                                       | 5     |
|                                                             | 4b  | Settings and locations where the data were collected                                                                                                                                        | -     |
| <i>Interventions</i>                                        | 5   | The interventions for each group with sufficient details to allow replication, including how and when they were actually administered                                                       | 5–6   |
| <i>Outcomes</i>                                             | 6a  | Completely defined pre-specified primary and secondary outcome measures, including how and when they were assessed                                                                          | 6–8   |
|                                                             | 6b  | Any changes to trial outcomes after the trial commenced, with reasons                                                                                                                       | -     |
| <i>Sample size</i>                                          | 7a  | How sample size was determined                                                                                                                                                              | 5     |
|                                                             | 7b  | When applicable, explanation of any interim analyses and stopping guidelines                                                                                                                | -     |
| <i>Randomization:</i>                                       |     |                                                                                                                                                                                             |       |
| Sequence generation                                         | 8a  | Method used to generate the random allocation sequence                                                                                                                                      | 8     |
|                                                             | 8b  | Type of randomization; details of any restriction (such as blocking and block size)                                                                                                         | 8     |
| Allocation concealment mechanism                            | 9   | Mechanism used to implement the random allocation sequence (such as sequentially numbered containers), describing any steps taken to conceal the sequence until interventions were assigned | 8     |
| Implementation                                              | 10  | Who generated the random allocation sequence, who enrolled participants, and who assigned participants to interventions                                                                     | 8     |
| <i>Blinding</i>                                             | 11a | If done, who was blinded after assignment to interventions (for example, participants, care providers, those assessing outcomes) and how                                                    | 6     |
|                                                             | 11b | If relevant, description of the similarity of interventions                                                                                                                                 | 5–6   |
| <i>Statistical methods</i>                                  | 12a | Statistical methods used to compare groups for primary and secondary outcomes                                                                                                               | 8–9   |
|                                                             | 12b | Methods for additional analyses, such as subgroup analyses and adjusted analyses                                                                                                            | -     |
| <b>Results</b>                                              |     |                                                                                                                                                                                             |       |
| <i>Participant flow (a diagram is strongly recommended)</i> | 13a | For each group, the numbers of participants who were randomly assigned, received intended treatment, and were analyzed for the primary outcome                                              | 10    |
|                                                             | 13b | For each group, losses and exclusions after randomization, together with reasons                                                                                                            | 10    |
| <i>Recruitment</i>                                          | 14a | Dates defining the periods of recruitment and follow-up                                                                                                                                     | 7     |
|                                                             | 14b | Why the trial ended or was stopped                                                                                                                                                          | -     |
| <i>Baseline data</i>                                        | 15  | A table showing baseline demographic and clinical characteristics for each group                                                                                                            | 9     |
| <i>Numbers analysed</i>                                     | 16  | For each group, number of participants (denominator) included in each analysis and whether the analysis was by original assigned groups                                                     | 10    |
| <i>Outcomes and estimation</i>                              | 17a | For each primary and secondary outcome, results for each group, and the estimated effect size and its precision (such as 95% confidence interval)                                           | 10–11 |
|                                                             | 17b | For binary outcomes, presentation of both absolute and relative effect sizes is recommended                                                                                                 | -     |
| <i>Ancillary analyses</i>                                   | 18  | Results of any other analyses performed, including subgroup analyses and adjusted analyses, distinguishing pre-specified from exploratory                                                   | -     |

|                          |    |                                                                                                                  |       |
|--------------------------|----|------------------------------------------------------------------------------------------------------------------|-------|
| <i>Harms</i>             | 19 | All important harms or unintended effects in each group (for specific guidance see CONSORT for harms)            | -     |
| <b>Discussion</b>        |    |                                                                                                                  |       |
| <i>Limitations</i>       | 20 | Trial limitations, addressing sources of potential bias, imprecision, and, if relevant, multiplicity of analyses | 16    |
| <i>Generalizability</i>  | 21 | Generalizability (external validity, applicability) of the trial findings                                        | 12–16 |
| <i>Interpretation</i>    | 22 | Interpretation consistent with results, balancing benefits and harms, and considering other relevant evidence    | 12–16 |
| <b>Other information</b> |    |                                                                                                                  |       |
| <i>Registration</i>      | 23 | Registration number and name of trial registry                                                                   | -     |
| <i>Protocol</i>          | 24 | Where the full trial protocol can be accessed, if available                                                      | -     |
| <i>Funding</i>           | 25 | Sources of funding and other support (such as supply of drugs), role of funders                                  | -     |

**Table S2.** Energy and micronutrient intake in the control group (CG) and intervention group (IG) during 6 weeks of study. Reproduced with appropriate permissions from Ref. [17]. Copyright 2021 Fernández-Lázaro, Diego. <https://www.mdpi.com/2072-6643/13/11/3969>.

| Group                        | CG <i>n</i> = 15 | IG <i>n</i> = 15 | <i>p</i> -value |
|------------------------------|------------------|------------------|-----------------|
| Energy (kcal/kg)             | 38.3 ± 5.8       | 39.7 ± 5.2       | 0.273           |
| Proteins (g)                 | 145.3 ± 36.9     | 138.3 ± 44.9     | 0.395           |
| Fats (g)                     | 139.3 ± 40.2     | 141.3 ± 42.6     | 0.748           |
| Carbohydrates (g)            | 340.2 ± 98.6     | 345.6 ± 103.2    | 0.435           |
| Ca (mg)                      | 1036.3 ± 214.1   | 1082.4 ± 193.6   | 0.345           |
| Mg (mg)                      | 542.3 ± 99.2     | 551.1 ± 95.9     | 0.863           |
| P (mg)                       | 2123.6 ± 66.1    | 2076.9 ± 84.3    | 0.583           |
| Fe (mg)                      | 21.1 ± 4.6       | 23.5 ± 5.7       | 0.801           |
| Zn (mg)                      | 13.7 ± 0.8       | 14.7 ± 0.8       | 0.699           |
| Vitamin A (µg)               | 1859.3 ± 1180.1  | 2002.1 ± 775.2   | 0.659           |
| Vitamin E (mg)               | 17.0 ± 2.5       | 17.3 ± 1.6       | 0.466           |
| Vitamin B <sub>1</sub> (mg)  | 2.6 ± 0.2        | 2.8 ± 0.6        | 0.526           |
| Vitamin B <sub>2</sub> (mg)  | 2.7 ± 0.2        | 2.7 ± 0.2        | 0.693           |
| Vitamin B (mg)               | 40.0 ± 7.1       | 37.2 ± 3.9       | 0.815           |
| Vitamin B <sub>6</sub> (mg)  | 4.1 ± 0.7        | 4.3 ± 0.9        | 0.831           |
| Vitamin B <sub>9</sub> (mg)  | 634.2 ± 171.1    | 636.4 ± 169.5    | 0.885           |
| Vitamin B <sub>12</sub> (µg) | 9.1 ± 3.9        | 9.3 ± 3.1        | 0.877           |
| Vitamin C (µg)               | 347.1 ± 138.2    | 356.4 ± 119.6    | 0.733           |

Data are expressed as mean ± standard deviation. *p*-value: significantly different between groups by independent *t*-test. Kilograms: kg; grams: g; milligrams: mg; micrograms: µg; kilocalories: Kcal; control group: CG; intervention group: IG.
